# Supplementary material for: Supramolecular assemblies of benzene-1,3,5-tricarboxylic acid and 3,5-substituted pyrazoles: formation and structural analysis
Source: Royal Society of Chemistry journal article supplement (doi:10.1039/c4ce02117g), 2015-01-01
Supplement: c4ce02117g1.pdf [file c4ce02117g1.pdf]

## Supporting Information

### Caption of Figures

**Fig. S1** Different non-covalent interactions in molecular structure of salt **1**. Color code: C, grey; O, red; N, blue.

**Fig. S2** Six membered cyclic cavity of H<sub>3</sub>BTC in **1** with included two molecules of Pz<sup>Me<sub>2</sub></sup>H. Color code: C, grey; H, white; O, red; N, blue.

**Fig. S3** Cavities align to form channels in which Pz<sup>Me<sub>2</sub></sup>H molecules in salt **1**. Color code: C, grey; H, white; O, red; N, blue. Hydrogen atoms have been omitted for clarity

**Fig. S4** ORTEP drawing with 50% probability of salt **2**.

**Fig. S5** Six membered hexagonal cavity of H<sub>3</sub>BTC with included two molecules of Pz<sup>iPr<sub>2</sub></sup>H in salt **2**. Color code: C, grey; H, white; N, blue; O, red

**Fig. S6** Different non-covalent interactions in molecular structure of salt **2**. Color code: C, grey; O, red; N, blue.

**Fig. S7** ORTEP drawing with 50% probability of salt **3**.

**Fig. S8** Six membered hexagonal cavity in salt **3** formed by H<sub>3</sub>BTC having Pz<sup>tBu, iPr</sup>H molecules. Color code: C, grey; H, white; N, blue; O, red.

**Fig. S9** Different non-covalent interactions in molecular structure of salt **3**. Color code: C, grey; O, red; N, blue.

**Fig. S10** C-H... $\pi$  interactions in salt **3**.

**Fig. S11** ORTEP drawing with 50% probability of co-crystal **4**.

**Fig. S12** Four membered cyclic cavity of H<sub>3</sub>BTC in **4**, with hydrogen bonded Pz<sup>Ph, Me</sup>H molecules outside the cavity.

**Fig. S13** Different non-covalent interactions in molecular structure of salt **4**. Color code: C, grey; O, red; N, blue.

**Fig. S14** Three dimensional packing of co-crystal **4**.

**Fig. S15** ORTEP drawing with 50% probability of salt **5**.

**Fig. S16** Hexagonal cavity formed by H<sub>3</sub>BTC in **5** having 3-cumenyl-5-methylpyrazole. Color code: C, grey; H, white; N, blue; O, red.

**Fig. S17** Different non-covalent interactions in molecular structure of salt **5**. Color code: C, grey; O, red; N, blue.

**Fig. S18**  $\pi$ ... $\pi$  interactions in salt **5**.

**Fig. S19** ORTEP drawing with 50% probability of salt **6**.

**Fig. S20** Different non-covalent interactions in molecular structure of salt **6**. Color code: C, grey; O, red; N, blue.

**Fig. S21** Hydrogen bonded discrete hexameric unit in **6**.

**Fig. S22** ORTEP drawing with 50% probability of salt **7**.

**Fig. S23** Six membered rectangular cavity of H<sub>3</sub>BTC in salt **7**, filled with two BPz H<sub>2</sub> and one methanol molecule.

**Fig. S24** Different non-covalent interactions in molecular structure of salt **7**. Color code: C, grey; O, red; N, blue.

**Fig. S25** Thermogravimetric curves for **1-7**.

**Fig. S26** Representative powder XRD patterns of salt **1** and co-crystal **4**. The left and right patterns in each case correspond to experimental and simulated, respectively.

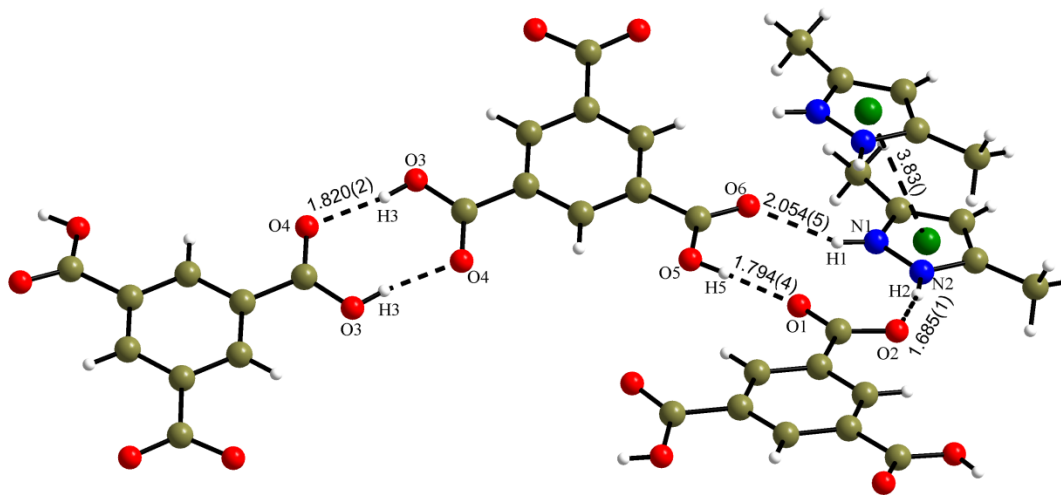

**Fig. S1**

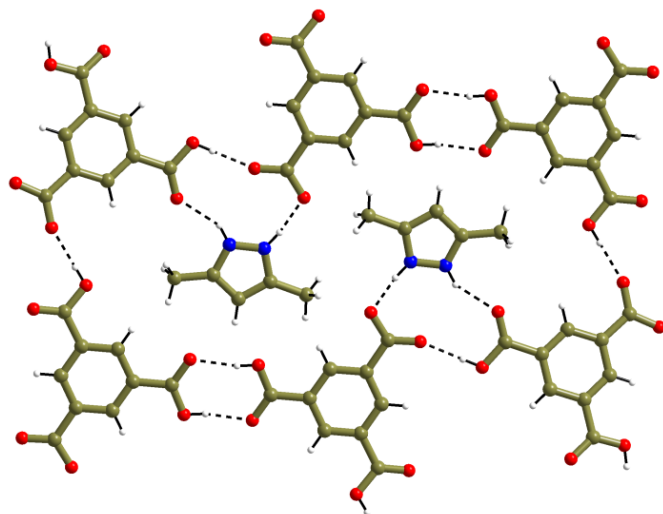

Fig. S2

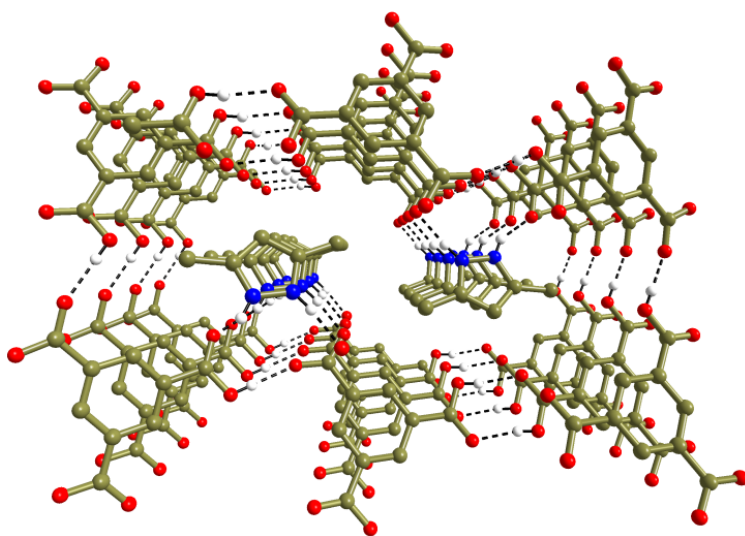

Fig. S3

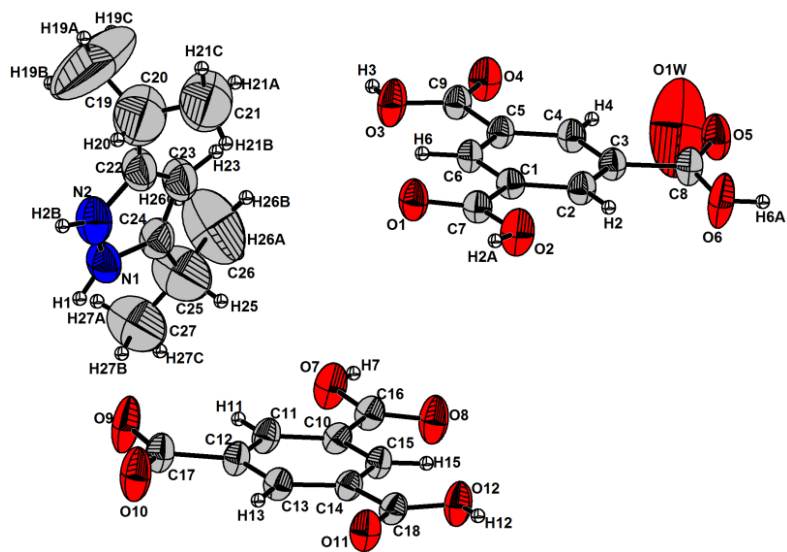

Fig. S4

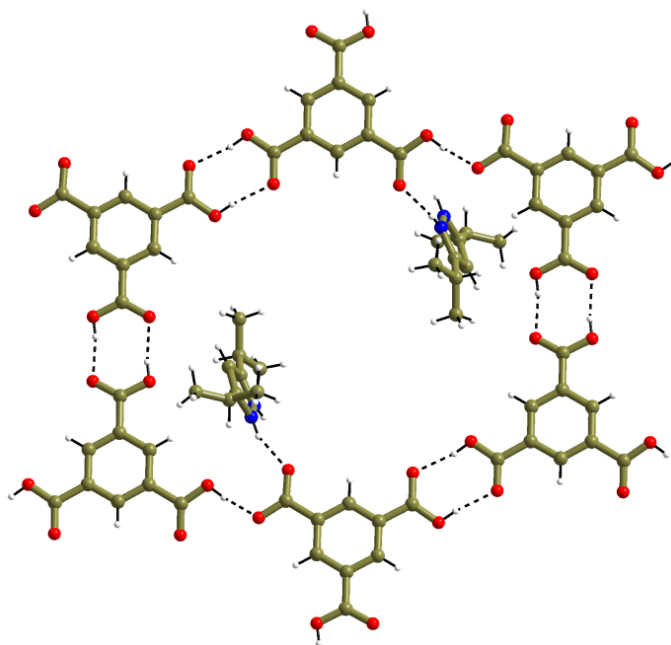

Fig. S5

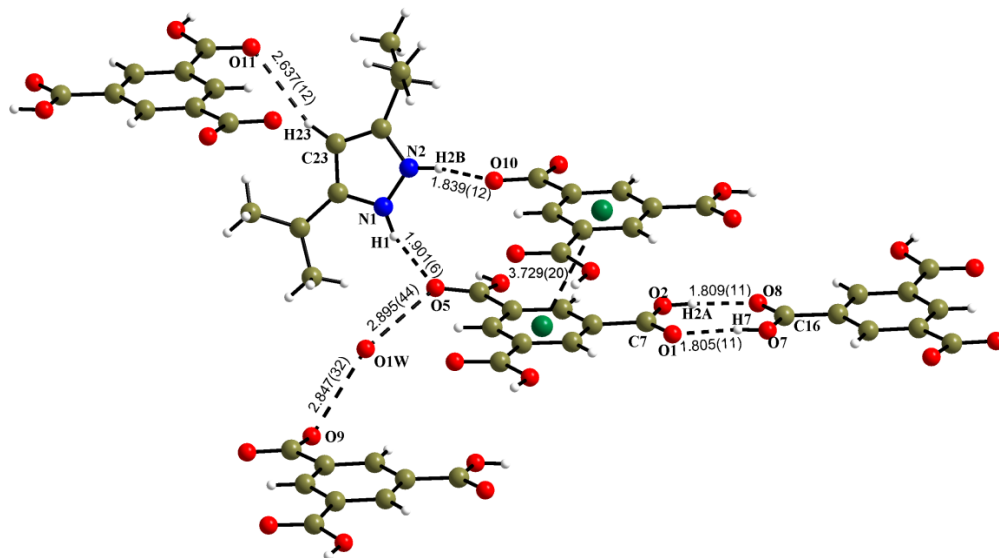

Fig. S6

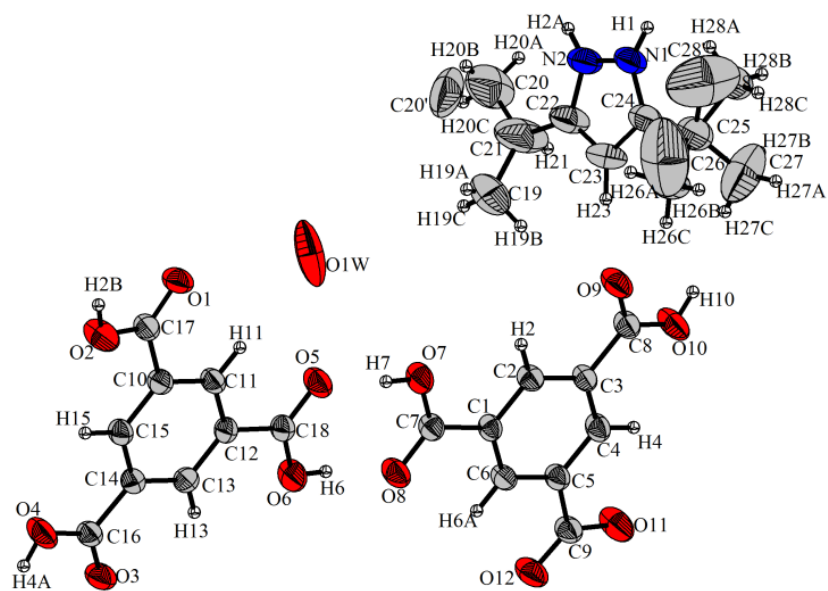

Fig. S7

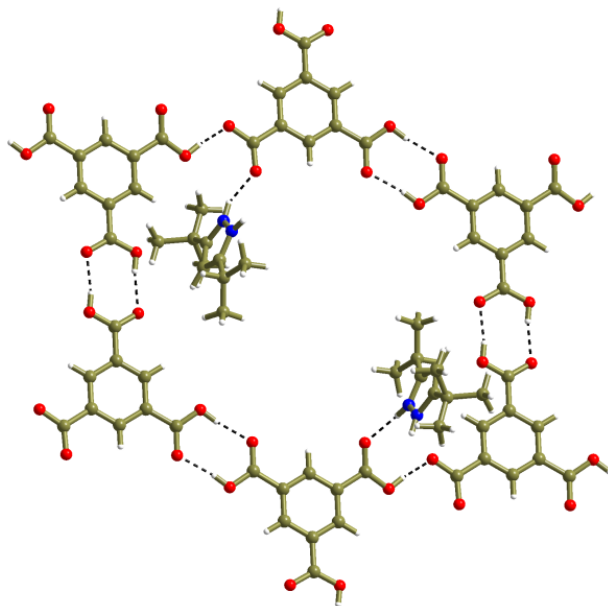

Fig. S8

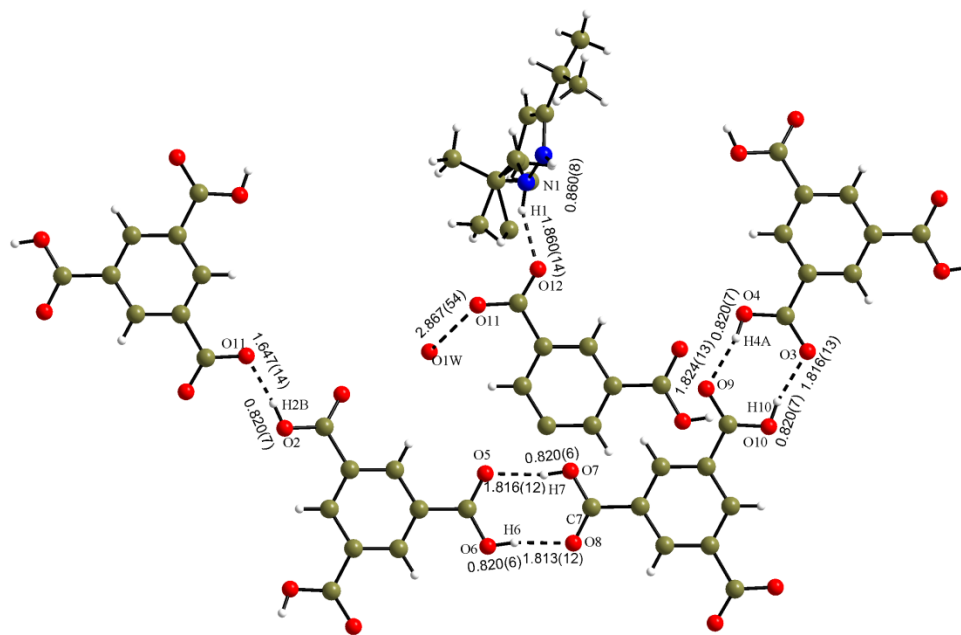

Fig. S9

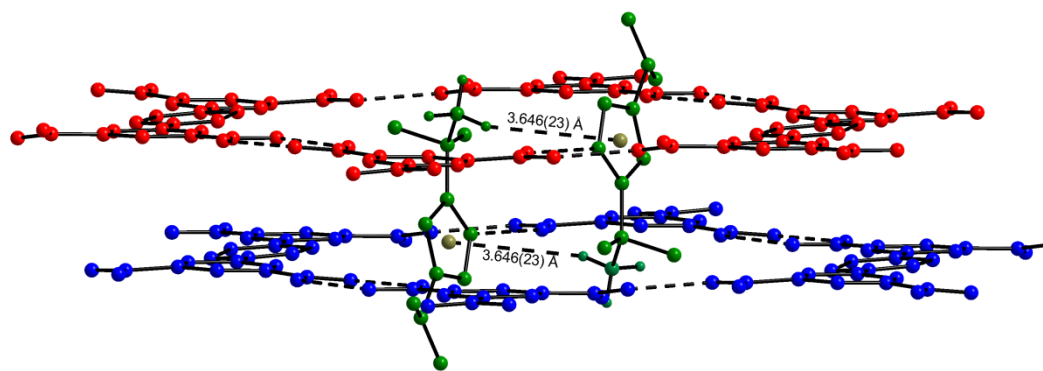

Fig. S10

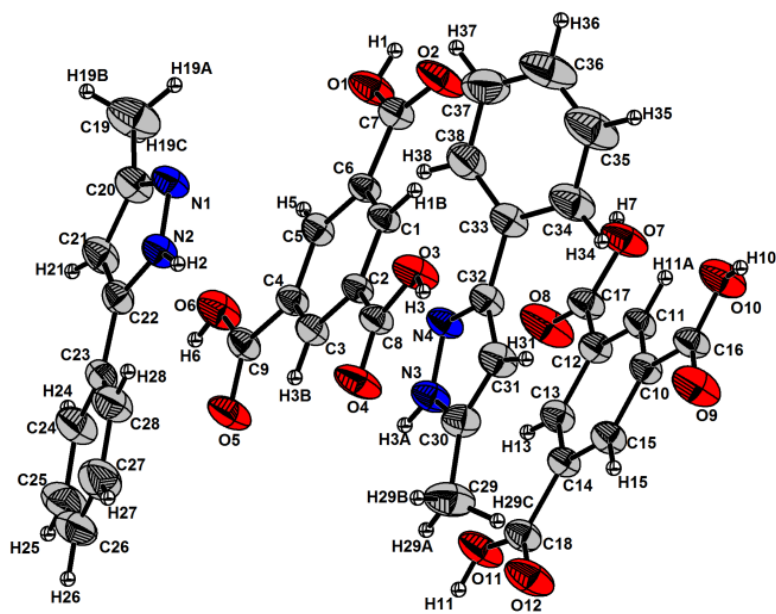

Fig. S11

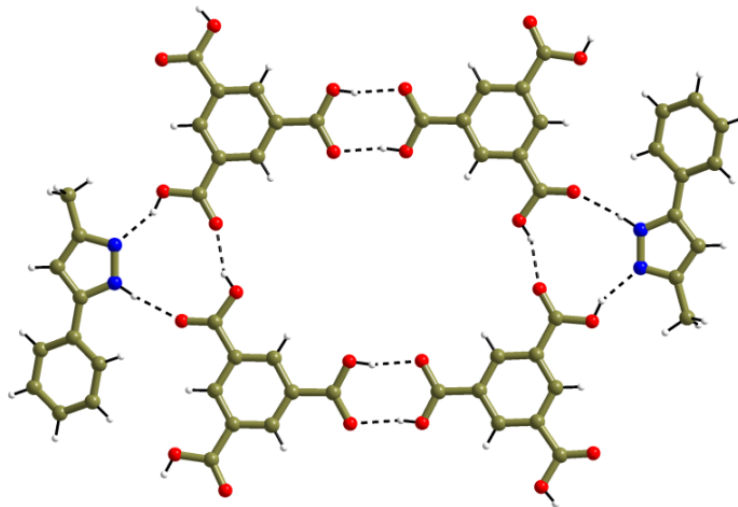

Fig. S12

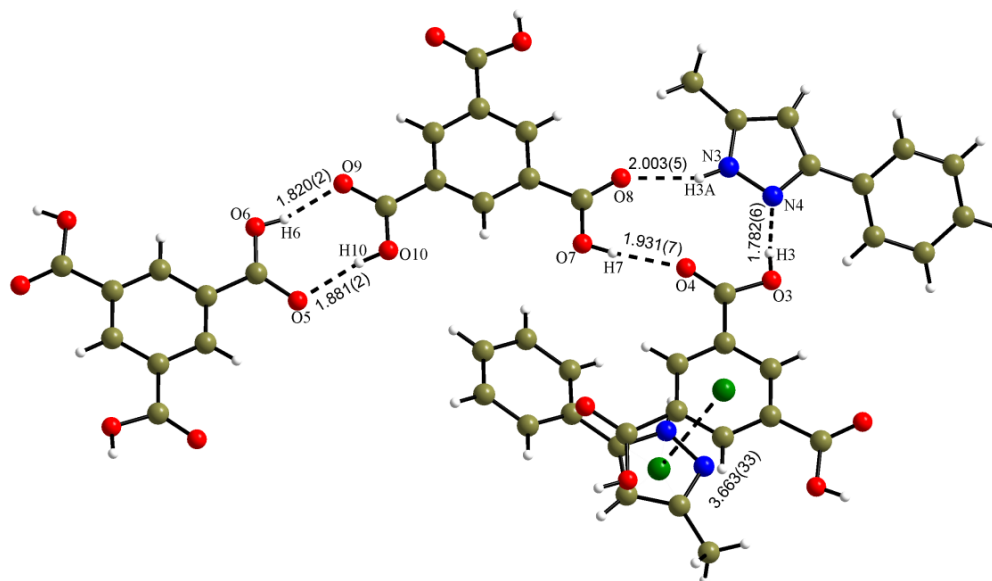

Fig. S13



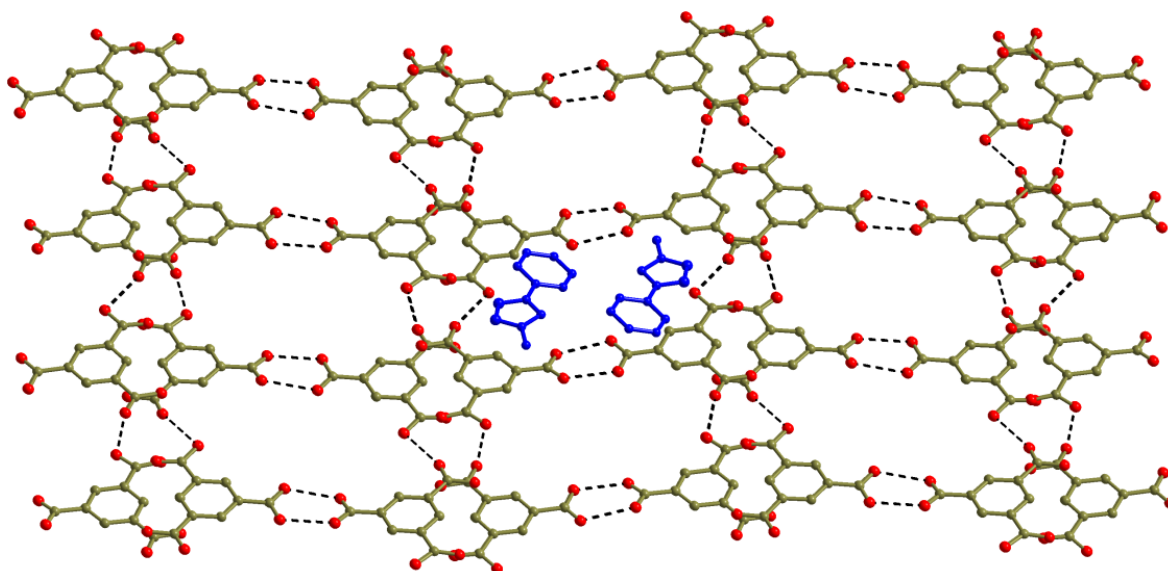

Fig. S14

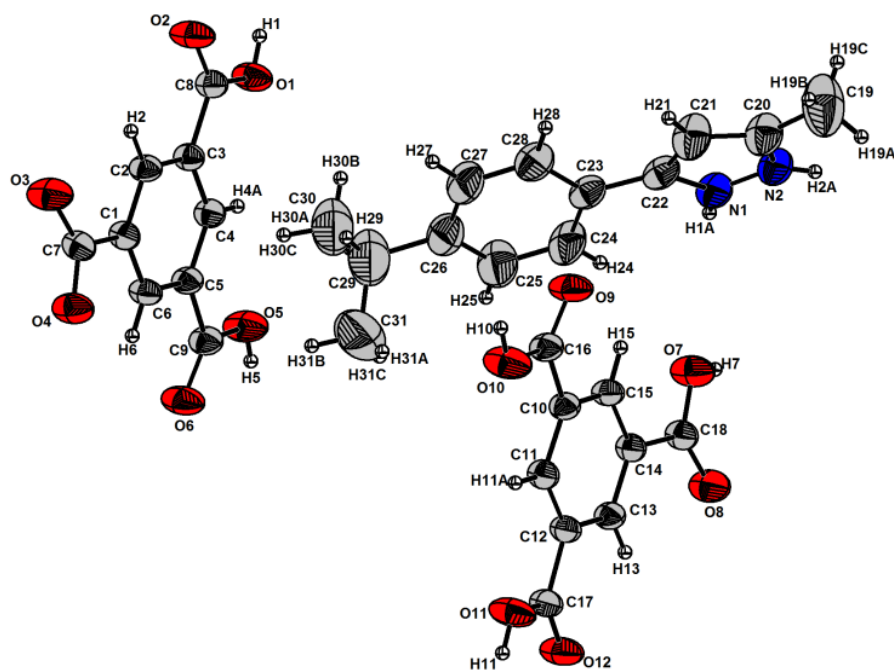

Fig. S15

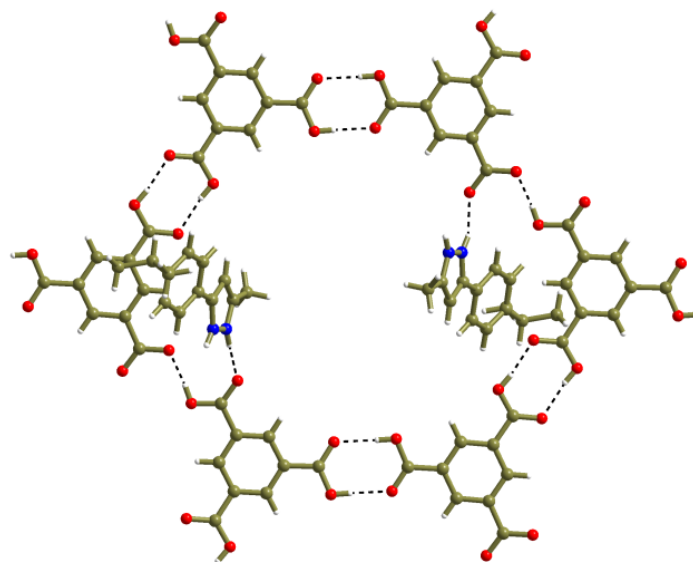

Fig. S16

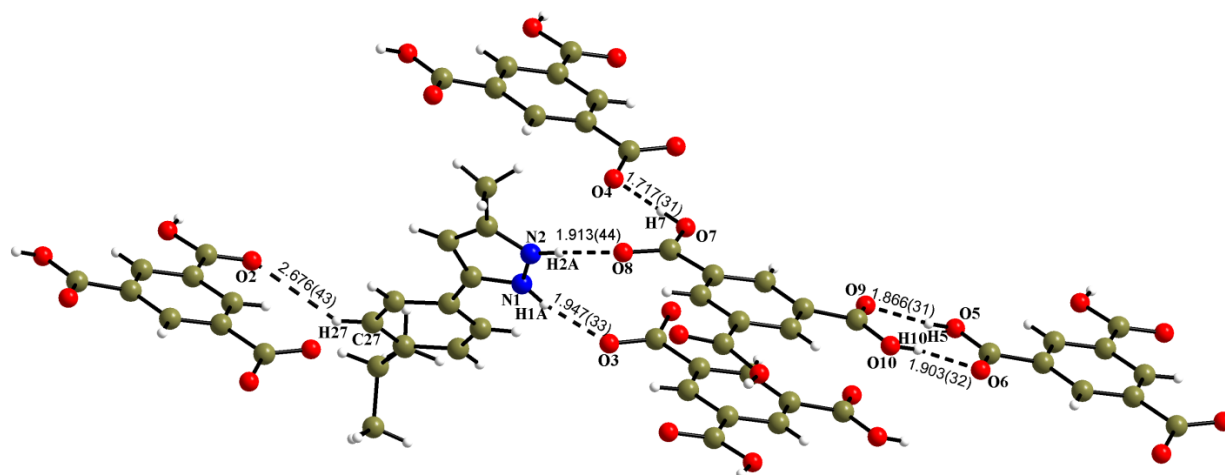

Fig. S17

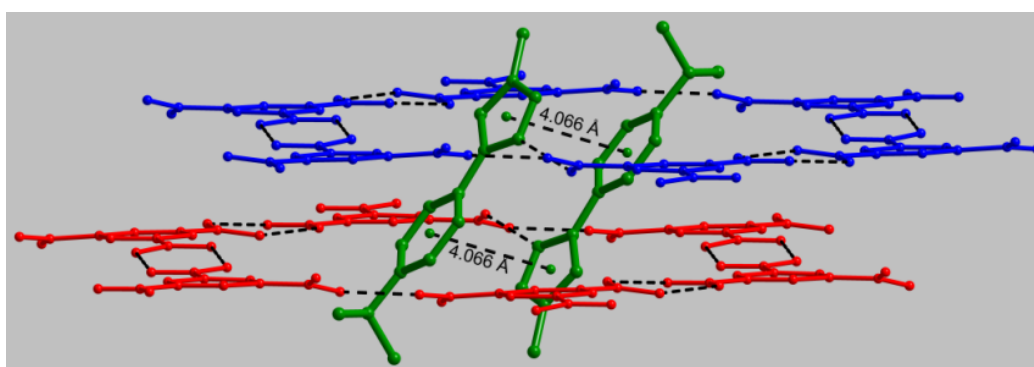

Fig. S18

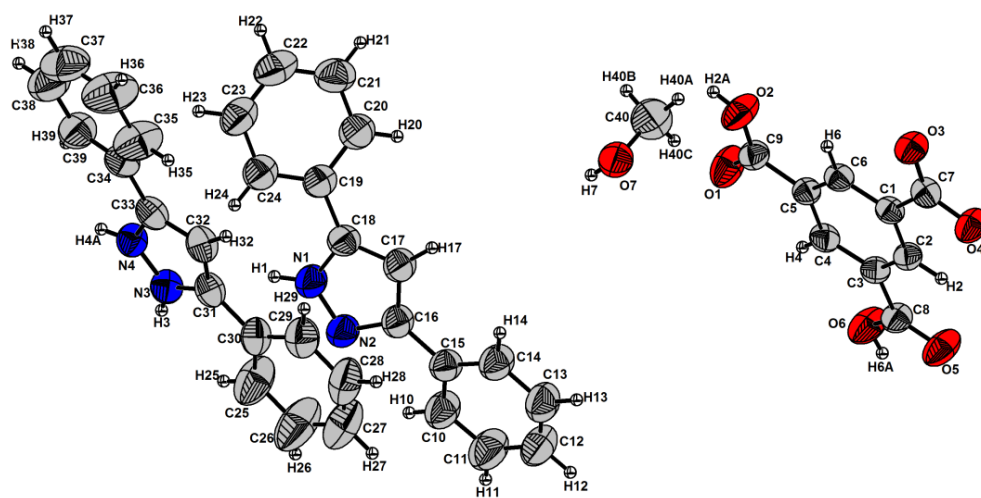

Fig. S19

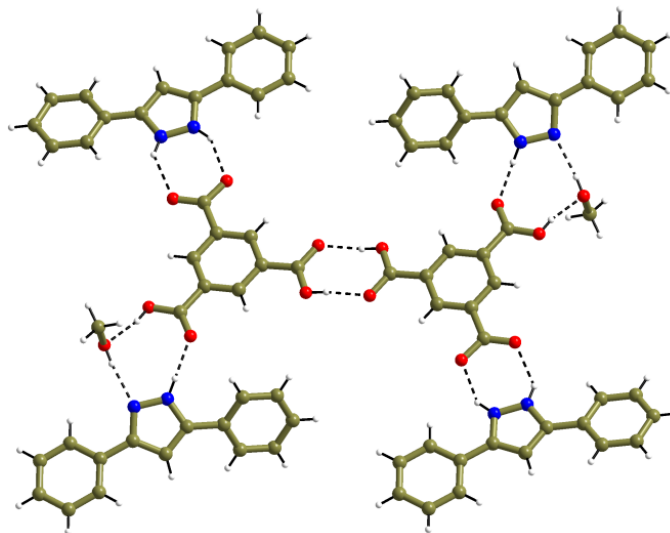

Fig. S20

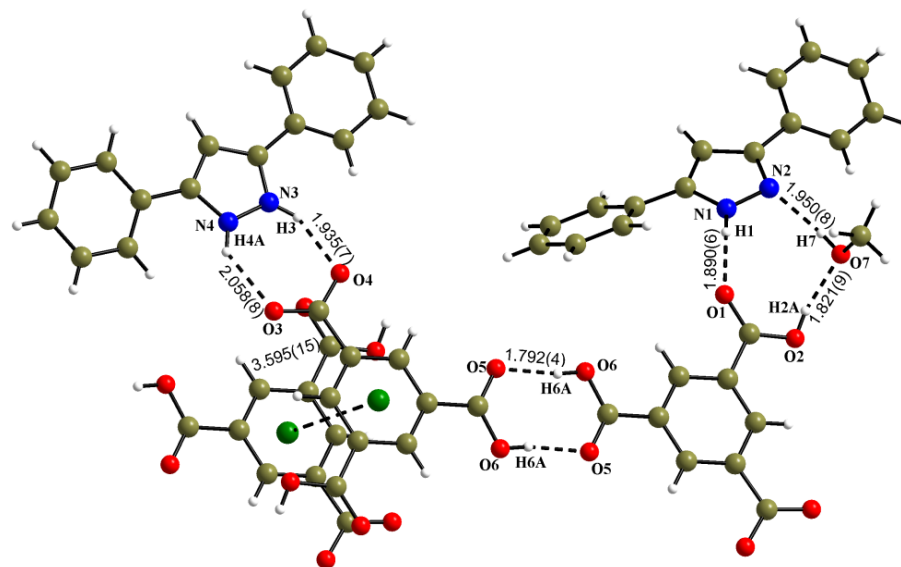

Fig. S21

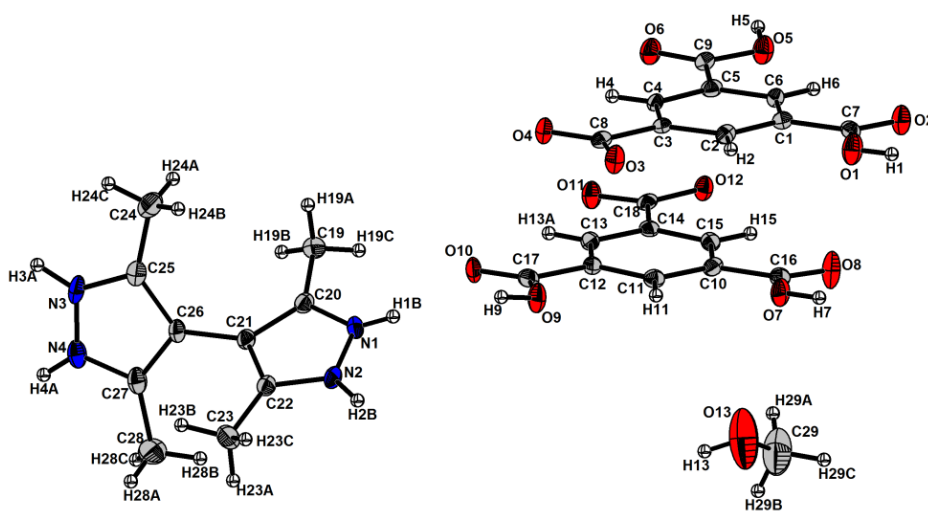

Fig. 22

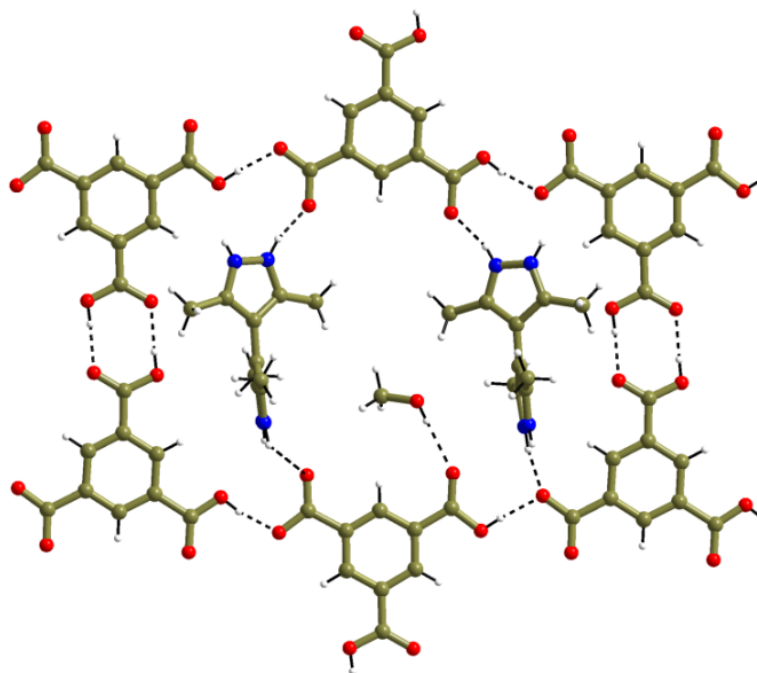

Fig. S23

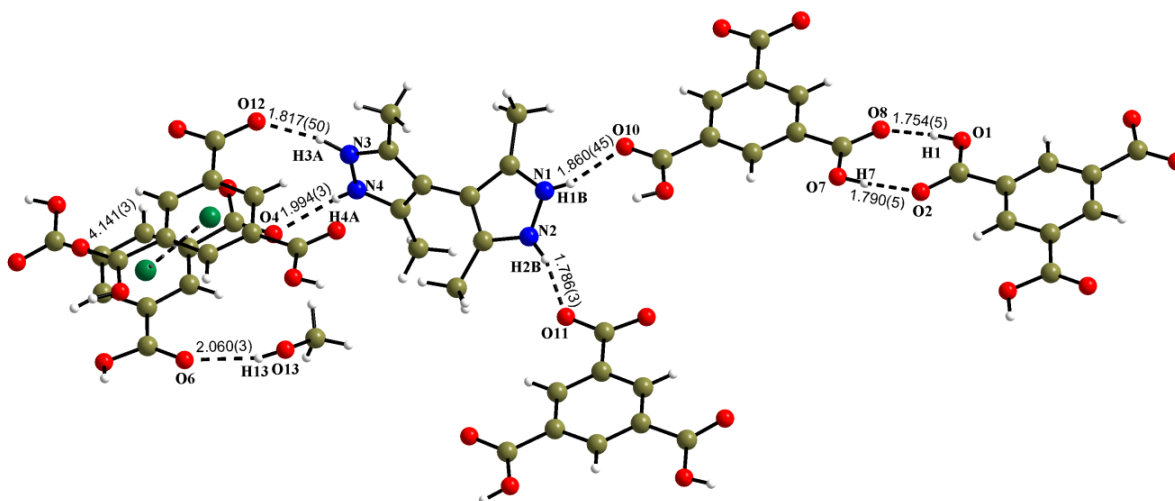

Fig. S24

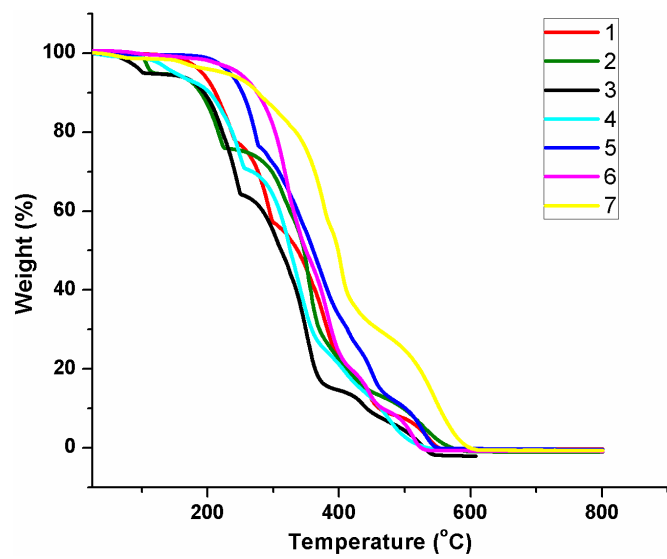

Fig. S25

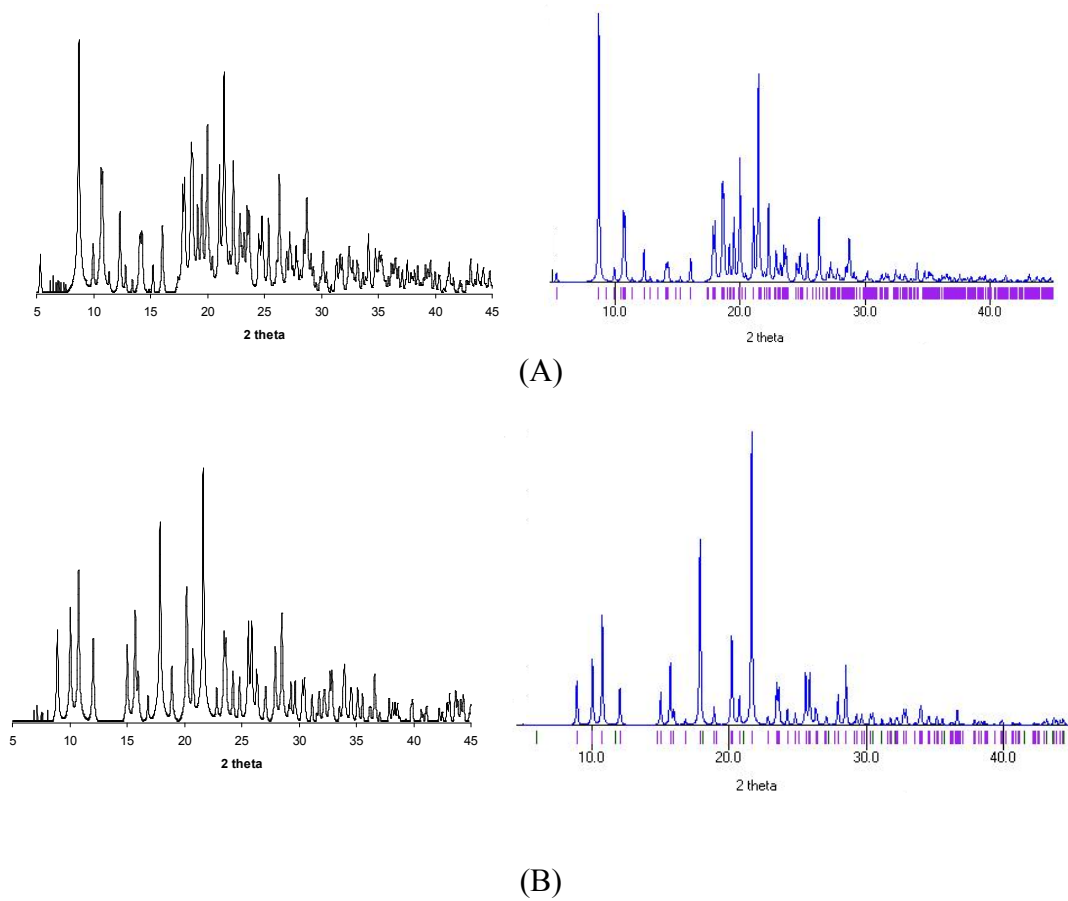

Fig. S26

**Table S1 Details of the thermal analysis**

| Compound No. | Temperature range (°C) and weight loss (%)                                                                                                                                                                                           | Thermal stability (°C) |
|--------------|--------------------------------------------------------------------------------------------------------------------------------------------------------------------------------------------------------------------------------------|------------------------|
| 1            | (i) No weight loss upto 187 °C.<br>(ii) I <sup>st</sup> weight loss (~25 %) upto 250 °C.<br>(iii) II <sup>nd</sup> weight loss (~45 %) upto 318 °C.<br>(iv) Last continuous step of weight loss (100 %) upto 550 °C.                 | 187 °C                 |
| 2            | (i) No loss upto 110 °C.<br>(ii) I <sup>st</sup> weight loss (~5 %) upto 124 °C and stable upto 177 °C.<br>(iii) II <sup>nd</sup> weight loss (~26 %) upto 230 °C.<br>(iv) Last continuous step of weight loss (100 %) upto 555 °C.  | 177 °C                 |
| 3            | (i) No loss upto 88 °C.<br>(ii) I <sup>st</sup> weight loss (~4.8 %) upto 115 °C and stable upto 180 °C.<br>(iii) II <sup>nd</sup> weight loss (~38 %) upto 240 °C.<br>(iv) Last continuous step of weight loss (100 %) upto 530 °C. | 180 °C                 |
| 4            | (i) No loss upto 150 °C.<br>(ii) I <sup>st</sup> weight loss (~5 %) upto 202 °C.                                                                                                                                                     |                        |

|   |                                                                                                                                                              |        |
|---|--------------------------------------------------------------------------------------------------------------------------------------------------------------|--------|
|   | (iii) II <sup>nd</sup> weight loss (~32 %) upto 268 °C.<br><br>(iv) Last continuous step of weight loss (100 %) upto 526 °C.                                 | 202 °C |
| 5 | (i) No loss upto 218° C.<br><br>(ii) I <sup>st</sup> weight loss (~26 %) upto 270 °C.<br><br>(iv) Last continuous step of weight loss (100 %) upto 530 C.    | 218 °C |
| 6 | (i) No loss upto 236°C.<br><br>(ii) Last continuous step of weight loss (100 °C) upto 520 °C.                                                                | 236 °C |
| 7 | (i) No loss upto 168 °C.<br><br>(ii) I <sup>st</sup> weight loss (~3.8 %) upto 230 °C.<br><br>(iii) Last continuous step of weight loss (100 %) upto 596 °C. | 230 °C |
